# Supplementary material for: In silico and in vitro assessment of an optimized QbD-guided myoinositol and metformin-loaded mucus-penetrating particle-based gel for the amelioration of PCOS
Source: Royal Society of Chemistry journal article supplement (doi:10.1039/d3na00943b), 2024-01-01
Supplement: d3na00943b1.pdf [file d3na00943b1.pdf]

### SUPPLEMENTARY MATERIAL

**Table S1:** The quality target product profile (QTPPs) elements of the nano-appended formulation (MPPs) along with CQAs and their related justification

| <b>QTPP elements</b>                           | <b>Target</b>                                                                                                                           | <b>CQA</b> | <b>Justification</b>                                                                                            |
|------------------------------------------------|-----------------------------------------------------------------------------------------------------------------------------------------|------------|-----------------------------------------------------------------------------------------------------------------|
| Clinical purpose (Therapeutic effect)          | Reach the ovarian tissue (Both hydrophilic APIs (MF and MI, the potential target to normalize the endocrine hormones and treat the PCOS | -          | Both of these drugs are reported to come under the first-line treatment for PCOS                                |
| Proposed pharmaceutical formulation            | Surface-modified nanoparticles (MPPs)-gel                                                                                               | -          | To improve therapeutic efficacy and patient compliance                                                          |
| Drug delivery system (route of administration) | Intra-vaginal drug delivery system                                                                                                      | -          | Deeply penetrate through the vaginal tissue to reach the systemic circulation through the uterovaginal pathways |
| Vaginal tolerability (irritation)              | No irritation<br>No any allergic effect<br>No inflammation                                                                              | -          | Dermal effect                                                                                                   |
| Targeted area                                  | Ovaries                                                                                                                                 | -          | Effect on therapeutic efficacy and help to ameliorate PCOS                                                      |
| Dosage form strength                           | Good                                                                                                                                    | -          | Influence the frequency of dosing and dose                                                                      |
| Particle diameter                              | ≤200nm (small)                                                                                                                          | Yes        | Effect on MPPs penetrability, targeted delivery, uniform distribution, and drug release                         |
| Polydispersity index                           | ≤0.3 (uniform)                                                                                                                          | Yes        | Effect on MPPs penetrability, targeted delivery, uniform distribution, and drug release                         |
| ζ potential                                    | More neutral than -10mV                                                                                                                 | Yes        | Effect on penetrability into the mucus layer, uniform distribution, and retention time                          |
| Biodegradable polymer concentration            | Optimized                                                                                                                               | Yes        | Facilitate particle size/shape, PDI, drug entrapment, and ζ potential                                           |
| Surfactant concentration                       | Optimized                                                                                                                               | Yes        | Effect on formulation development, particle size, and shape.                                                    |
| Carbomer concentration                         | Optimum                                                                                                                                 | Yes        | Effect on texture and viscosity of MPPs-gel formulation                                                         |
| Glycerol                                       | Optimum                                                                                                                                 | Yes        | Moisturizing effect on vaginal tissue                                                                           |
| Lactic acid                                    | Vaginal pH                                                                                                                              | Yes        | maintain suitable mucosal environment                                                                           |
| pH                                             | Vaginal pH                                                                                                                              | Yes        | Effect on vaginal mucus membrane irritation and inflammation of the tissue                                      |
| Temperature                                    | 50-60°C                                                                                                                                 | Yes        | Impact on nano-formulation development                                                                          |

|                            |           |     |                                                         |
|----------------------------|-----------|-----|---------------------------------------------------------|
| Drug entrapment efficiency | High      | Yes | Facilitate the dosing quantity and drug delivery system |
| Drug release               | Sustained | Yes | Facilitate the dosing quantity and drug delivery system |
| Needle type                | Small     | Yes | Effect on particle size and PDI                         |
| Injection rate             | Optimized | Yes | Effect on particle size and PDI                         |
| Stirring speed             | High      | Yes | Effect on particle size, PDI, and stability             |
| Stirring time              | Optimized | Yes | Effect on particle size, PDI, and stability             |

| <b>CQAs</b>    | Clinical objective | Route of administration | Dosage form | Method | Vaginal tissue irritation | Retention time | Stability | Dosage form applicator |
|----------------|--------------------|-------------------------|-------------|--------|---------------------------|----------------|-----------|------------------------|
| <b>PS</b>      | Medium             | Medium                  | High        | High   | Medium                    | Medium         | High      | Low                    |
| <b>PDI</b>     | Low                | Low                     | High        | High   | Low                       | Low            | High      | Low                    |
| <b>ZP</b>      | Medium             | High                    | High        | Medium | Low                       | Medium         | High      | Low                    |
| <b>EE</b>      | Low                | Medium                  | High        | High   | Low                       | High           | High      | Low                    |
| <b>TA</b>      | Low                | Low                     | High        | Low    | Medium                    | Medium         | Medium    | High                   |
| <b>RS</b>      | Low                | Low                     | Medium      | Low    | Medium                    | Medium         | Medium    | High                   |
| <b>pH</b>      | Medium             | Medium                  | Medium      | Low    | High                      | Medium         | Medium    | Low                    |
| <b>Release</b> | High               | High                    | High        | Medium | Low                       | High           | High      | Medium                 |

**Figure S1:** The RAM facilitated the QAs Vs QTPPs relationship

| QAs     | MAs        |            |                 |            |              |                |                |        |           |             | PPs            |                 |                     |             |                       |                                    |
|---------|------------|------------|-----------------|------------|--------------|----------------|----------------|--------|-----------|-------------|----------------|-----------------|---------------------|-------------|-----------------------|------------------------------------|
|         | PLGA grade | PLGA conc. | Organic solvent | Drug conc. | PF 127 conc. | Carbomer grade | Carbomer conc. | TEA    | Glycerine | Lactic acid | Injection rate | Injection speed | Temperature of MPPs | Needle size | Stirring time of mpps | Stirring time of carbomer solution |
| PS      | Low        | High       | Medium          | Medium     | High         | Low            | Low            | Low    | Low       | Low         | High           | High            | High                | High        | Medium                | Low                                |
| PDI     | Low        | High       | Medium          | high       | High         | Low            | Low            | Low    | Low       | Low         | High           | High            | High                | High        | Medium                | Low                                |
| ZP      | Medium     | Medium     | Low             | High       | High         | Medium         | Medium         | Medium | Medium    | Medium      | Low            | Low             | Low                 | Low         | Low                   | Low                                |
| EE      | Medium     | High       | Low             | High       | High         | Low            | Low            | Low    | Low       | Low         | Medium         | Low             | Medium              | Low         | Medium                | Low                                |
| TA      | Low        | Low        | Low             | Low        | Low          | Medium         | High           | Medium | Medium    | Low         | Low            | Low             | Low                 | Low         | Low                   | Medium                             |
| RS      | Medium     | Medium     | Low             | Medium     | Medium       | Medium         | High           | Medium | Medium    | Medium      | Medium         | Low             | Low                 | Low         | Low                   | Medium                             |
| pH      | Low        | Medium     | Low             | Low        | Medium       | High           | High           | Medium | Medium    | High        | Low            | Low             | Low                 | Low         | Low                   | Low                                |
| Release | High       | Medium     | Low             | Medium     | Medium       | Medium         | Medium         | Medium | Low       | Medium      | Medium         | Medium          | Medium              | Medium      | Medium                | Medium                             |

**Figure S2:** The RAM facilitated the QAs Vs MAs/PPs relationship

**Table S2:** FMEA of different risk factors involved in development of formulation which also include their related failure mode, potential cause and their control. The severity score (S), probability of occurrence (O) and detectability (D) scores of MAs and PPs in relation with their failure mode were revealed. The RPN number of risk variable were calculated and classified accordingly into high, medium and low risk.

| Risk variable         | Failure mode                                      | Failure effect                                                                                                                                                                            | S | Potential cause                                                                                                                                                | O | control                                                                                                                                                                       | D | RPN | Risk   |
|-----------------------|---------------------------------------------------|-------------------------------------------------------------------------------------------------------------------------------------------------------------------------------------------|---|----------------------------------------------------------------------------------------------------------------------------------------------------------------|---|-------------------------------------------------------------------------------------------------------------------------------------------------------------------------------|---|-----|--------|
| <b>QAs</b>            |                                                   |                                                                                                                                                                                           |   |                                                                                                                                                                |   |                                                                                                                                                                               |   |     |        |
| <b>Particle size</b>  | Large particle size (>200nm)                      | Failure to deep mucosal penetration, reach the targeted area and dose uniformity issue                                                                                                    | 9 | Change in concentration of polymer and surfactant<br>Change in temperature, stirring speed and time                                                            | 8 | The optimum and precise quantity of polymer and surfactant will significantly affect the particle along with the control/constant temperature, stirring speed and time        | 9 | 512 | High   |
| <b>PDI</b>            | >0.3                                              | Alter in dose uniformity, uniform distribution of drug in the particles, and drug loading capacity                                                                                        | 8 | Major factors are Change in concentration of polymer and surfactant, change in temperature, stirring speed and time                                            | 8 | The optimum and precise quantity of polymer and surfactant will be significantly affecting the particle along with the control/constant temperature, stirring speed and time. | 8 | 512 | High   |
| <b>Zeta potential</b> | Highly negative or highly positive surface charge | failure to cross the vaginal mucosal membrane/barrier and not capable to reach on the targeted area<br>Failure to maintain MIC level in a targeted area<br>Stability issue of formulation | 7 | Ionic property of selected materials (especially those material which are present on the outer shell of particles) are key factor to affect the zeta potential | 7 | The selected coating material and surfactant are potent to neutralize nanoparticle surface charge.                                                                            | 6 | 294 | Medium |

|                                   |                                                                  |                                                                                                                                                          |   |                                                                                         |   |                                                                                                                                                          |   |     |        |
|-----------------------------------|------------------------------------------------------------------|----------------------------------------------------------------------------------------------------------------------------------------------------------|---|-----------------------------------------------------------------------------------------|---|----------------------------------------------------------------------------------------------------------------------------------------------------------|---|-----|--------|
| <b>Drug entrapment efficiency</b> | A low percentage of drug entrapment efficiency                   | Alter in dose uniformity, uniform distribution of a drug in the particles, and minimum effective concentration (MIC)                                     | 8 | Formulation development method, surfactant concentration and temperature are key factor | 8 | Method should be developed based on drug solubility profile and log P value<br>The optimum amount of surfactant affects the drug entrapment efficiency   | 7 | 448 | High   |
| <b>Drug loading</b>               | Low % of drug loading                                            | Alter in dose uniformity, uniform distribution of a drug in the particles, and minimum effective concentration (MIC)<br>Negative impact on dose capacity | 6 | Formulation development method, surfactant concentration and temperature are key factor | 7 | Method should be developed on the basis of drug solubility profile and log P value<br>Optimum amount of surfactant affect the drug entrapment efficiency | 7 | 294 | Medium |
| <b>Drug release</b>               | Low limits of drug entrapment efficiency /pharmacological action | Formulation failure as its effects on pharmacological effect                                                                                             | 6 | Drug entrapment efficiency and drug loading capacity                                    | 6 | Maximum limit of drug entrapment efficiency, loading capacity and sustained release                                                                      | 7 | 294 | Medium |
| <b>Content uniformity</b>         | Non-uniform drug                                                 | Negative impact on dose capacity and drug release                                                                                                        | 5 | High PDI, and inadequate temperature range                                              | 5 | Optimum PDI, temperature and stirring speed and time                                                                                                     | 4 | 100 | Low    |
| <b>MAs</b>                        |                                                                  |                                                                                                                                                          |   |                                                                                         |   |                                                                                                                                                          |   |     |        |

|                                      |                                                                    |                                                                                                                           |   |                                                                                                                                                                                                           |   |                                                                                                                                                                         |   |     |      |
|--------------------------------------|--------------------------------------------------------------------|---------------------------------------------------------------------------------------------------------------------------|---|-----------------------------------------------------------------------------------------------------------------------------------------------------------------------------------------------------------|---|-------------------------------------------------------------------------------------------------------------------------------------------------------------------------|---|-----|------|
| <b>Organic solvent concentration</b> | Inadequate quantity                                                | Impact on formulation development and emulsification                                                                      | 3 | Inadequate quantity affects the formulation development                                                                                                                                                   | 2 | Optimum quantity helps in proper emulsion formation during the processing of formulation development                                                                    | 3 | 18  | Low  |
| <b>Polymer concentration</b>         | Inadequate particle size, PDI, drug loading capacity               | Drug release, drug loading capacity, entrapment efficiency, particles size, and PDI are the majorly affected factors      | 9 | Polymer concentration majorly contributed to the formulation development that affects the drug release, drug loading capacity, entrapment efficiency, particles size, and PDI                             | 8 | an accurate and precise quantity of polymeric concentration possessed optimum results                                                                                   | 9 | 684 | High |
| <b>PF127 concentration</b>           | Inadequate particle size, PDI, drug loading capacity and stability | Drug loading capacity, entrapment efficiency, stability, particles size, and PDI are affected by surfactant concentration | 8 | High surfactant concentration gave better results of particle size/PDI but low drug entrapment efficiency/loading capacity while excessive low concentration facilitates large particle size and high PDI | 8 | Optimum concentration facilitates required particle size/PDI and a high % of drug entrapment efficiency/loading capacity. It also provides stability to the formulation | 8 | 512 | High |

|                              |                                                                 |                                                                                                                                                                                                                     |   |                                                                                            |   |                                                                                                      |   |     |        |
|------------------------------|-----------------------------------------------------------------|---------------------------------------------------------------------------------------------------------------------------------------------------------------------------------------------------------------------|---|--------------------------------------------------------------------------------------------|---|------------------------------------------------------------------------------------------------------|---|-----|--------|
| <b>Drug concentration</b>    | Low drug loading capacity                                       | High concentration might affect on the quality of particle size and low entrapment efficiency. Excessive low concentration fail to meet the therapeutic effect of drug                                              | 8 | High concentration might affect the quality of particle size and low entrapment efficiency | 8 | The optimum concentration provides better therapeutic effect and improved the quality of the product | 8 | 512 | High   |
| <b>Formulation method</b>    | The solvent evaporation method failed to load hydrophilic drugs | Less % of drug entrapment efficiency and loading capacity                                                                                                                                                           | 5 | An alternative method might improve the entrapment efficiency and loading capacity         | 7 | The double emulsion method provided improved drug loading capacity and entrapment efficiency         | 7 | 245 | Medium |
| <b>Caromer concentration</b> | Either very high viscosity or very low                          | Solidified/ liquified gel might effect on texture and viscosity of gel while less viscose gel might be expelled from the vaginal cavity thus effect on the therapeutic dose. It also effects on patient compliance. | 8 | A change in concentration could alter the texture and viscosity of the gel                 | 6 | Optimum concentration could improve the texture and viscosity of gel                                 | 6 | 288 | Medium |



|                    |                                                                         |                                                                                                                                        |   |                                                                                                                    |   |                                                                                        |   |     |        |
|--------------------|-------------------------------------------------------------------------|----------------------------------------------------------------------------------------------------------------------------------------|---|--------------------------------------------------------------------------------------------------------------------|---|----------------------------------------------------------------------------------------|---|-----|--------|
| <b>Glycerol</b>    | High concentration                                                      | Might affect on physical properties of gel                                                                                             | 6 | High lubricating effect on vaginal cavity                                                                          | 5 | Optimum concentration could moisturize the vaginal tissue                              | 6 | 180 | Medium |
| <b>Lactic acid</b> | High concentration                                                      | Alter pH of vaginal cavity                                                                                                             | 6 | High concentration might cause burning sensation/irritation                                                        | 5 | Optimum concentration maintain vaginal pH.                                             | 6 | 180 | Medium |
| <b>pH</b>          | Outside the limit of the simulated vaginal pH range and skin irritation | Skin irritation and change in release profile                                                                                          | 6 | Change in concentration of required component                                                                      | 6 | Optimum pH needs to avoid irritation, inflammation, and discomfort on the vaginal area | 5 | 180 | Medium |
| <b>Log P</b>       | Reduce permeability                                                     | Change in permeability                                                                                                                 | 2 | Physicochemical properties of API                                                                                  | 3 | -                                                                                      | 3 | 18  | Low    |
| <b>PPs</b>         |                                                                         |                                                                                                                                        |   |                                                                                                                    |   |                                                                                        |   |     |        |
| <b>Temperature</b> | Inadequate temperature range                                            | Inadequate formulation development, change in particle size and PDI affect drug entrapment efficiency, loading capacity and uniformity | 7 | At low temperatures, failure of emulsification in the processing of nanoparticles, enhanced particle size, and PDI | 7 | Optimum constant temperature                                                           | 6 | 294 | Medium |

|                       |                                                  |                                                                                                                                                                                         |   |                                                                 |   |                                                      |   |     |        |
|-----------------------|--------------------------------------------------|-----------------------------------------------------------------------------------------------------------------------------------------------------------------------------------------|---|-----------------------------------------------------------------|---|------------------------------------------------------|---|-----|--------|
| <b>Needle type</b>    | High range of particles size                     | Alteration in particle size and PDI of the formulation                                                                                                                                  | 2 | Change in needle size                                           | 3 | Proper screening of needle size                      | 2 | 12  | Low    |
| <b>Injection rate</b> | High range of particles size                     | Enhance particle size and PDI of the formulation                                                                                                                                        | 4 | Non-uniform plunger pressure leads to change the injection rate | 5 | Constant plunger pressure and optimum injection rate | 4 | 80  | Low    |
| <b>Stirring speed</b> | High range of particles size and increase in PDI | An extended range of particles size and high PDI are responsible for non-uniform dose, failure to cross the vaginal mucosal membrane/barrier, also effect on drug entrapment efficiency | 6 | Slow and irregular stirring speed                               | 7 | High and constant stirring speed                     | 6 | 252 | Medium |
| <b>Stirring time</b>  | Instability                                      |                                                                                                                                                                                         | 7 |                                                                 | 7 |                                                      | 6 | 294 |        |
| <b>homogeneity</b>    | Non-uniform drug distribution and dose           |                                                                                                                                                                                         | 3 |                                                                 | 2 |                                                      | 3 | 18  |        |

**Table S3 (Supplementary material): Total 19 runs of formulation trials with the response of CQAs**

| Trials | MAs          |            | PPs            |          |                  |                    |        |        |
|--------|--------------|------------|----------------|----------|------------------|--------------------|--------|--------|
|        | PLGA polymer | PF127(%)   | Stirring speed | S. time  | Temperature (°C) | Inj. Rate (ml/min) | PS     | PDI    |
| F1     | <b>10</b>    | 0.4        | 1500           | 6h       | 60               | 1                  | 125.6  | 0.156  |
| F2     | <b>20</b>    | 0.4        | 1500           | 6h       | 60               | 1                  | 167.1  | 0.178  |
| F3     | <b>30</b>    | 0.4        | 1500           | 6h       | 60               | 1                  | 197.25 | 0.169  |
| F4     | 40           | 0.4        | 1500           | 6        | 60               | 1                  | 251.41 | 0.245  |
| F5     | 30           | <b>0.1</b> | 1500           | 6        | 60               | 1                  | 210.12 | 0.412  |
| F6     | 30           | <b>0.5</b> | 1500           | 6        | 60               | 1                  | 195.15 | 0.157  |
| F7     | 30           | <b>1.0</b> | 1500           | 6        | 60               | 1                  | 139.87 | 0.0782 |
| F8     | 30           | 0.4        | <b>500</b>     | 6        | 60               | 1                  | 248.69 | 0.314  |
| F9     | 30           | 0.4        | <b>1000</b>    | 6        | 60               | 1                  | 221.09 | 0.287  |
| F10    | 30           | 0.4        | <b>1500</b>    | 6        | 60               | 1                  | 198.47 | 0.192  |
| F11    | 30           | 0.4        | 1500           | <b>3</b> | 60               | 1                  | 215.89 | 0.478  |
| F12    | 30           | 0.4        | 1500           | <b>5</b> | 60               | 1                  | 196.78 | 0.287  |
| F13    | 30           | 0.4        | 1500           | <b>7</b> | 60               | 1                  | 198.47 | 0.194  |
| F14    | 30           | 0.4        | 1500           | 6        | <b>30</b>        | 1                  | 578    | 1.083  |
| F15    | 30           | 0.4        | 1500           | 6        | <b>40</b>        | 1                  | 201.98 | 0.277  |
| F16    | 30           | 0.4        | 1500           | 6        | <b>60</b>        | 1                  | 199.44 | 0.178  |
| F17    | 30           | 0.4        | 1500           | 6        | 60               | <b>1</b>           | 184.28 | 0.217  |

|     |    |     |      |   |    |   |        |       |
|-----|----|-----|------|---|----|---|--------|-------|
| F18 | 30 | 0.4 | 1500 | 6 | 60 | 2 | 238.86 | 0.374 |
| F19 | 30 | 0.4 | 1500 | 6 | 60 | 3 | 289.78 | 0.318 |

**Table S4 (Supplementary material):** Optimization range of some PPs

| S.no. | Process parameters (PPs) | Optimized value |
|-------|--------------------------|-----------------|
| 1.    | Temperature (°C)         | 60°C            |
| 2.    | Stirring speed (rpm)     | 1500rpm         |
| 3.    | Stirring time (hrs)      | 6-8hrs          |
| 4.    | Injection rate (ml/min)  | 1ml/min         |

**Table S5 (Supplementary material):** Various factors and their level of the different ranges including axial points were applied in the DoE.

| Independent variable, CMAs          | Level  |      |      |      |        |
|-------------------------------------|--------|------|------|------|--------|
|                                     | -6.82  | -1   | 0    | +1   | 6.82   |
| <b>X1 = PLGA conc (mg)</b>          | 13.18  | 20.0 | 30.0 | 40.0 | 46.82  |
| <b>X2 = PF127 conc(%)</b>           | 0.0636 | 0.20 | 0.30 | 0.40 | 0.7364 |
| <b>X3 = Drug conc (mg) D1 or D2</b> | 33.18  | 40   | 50.0 | 60.0 | 66.82  |

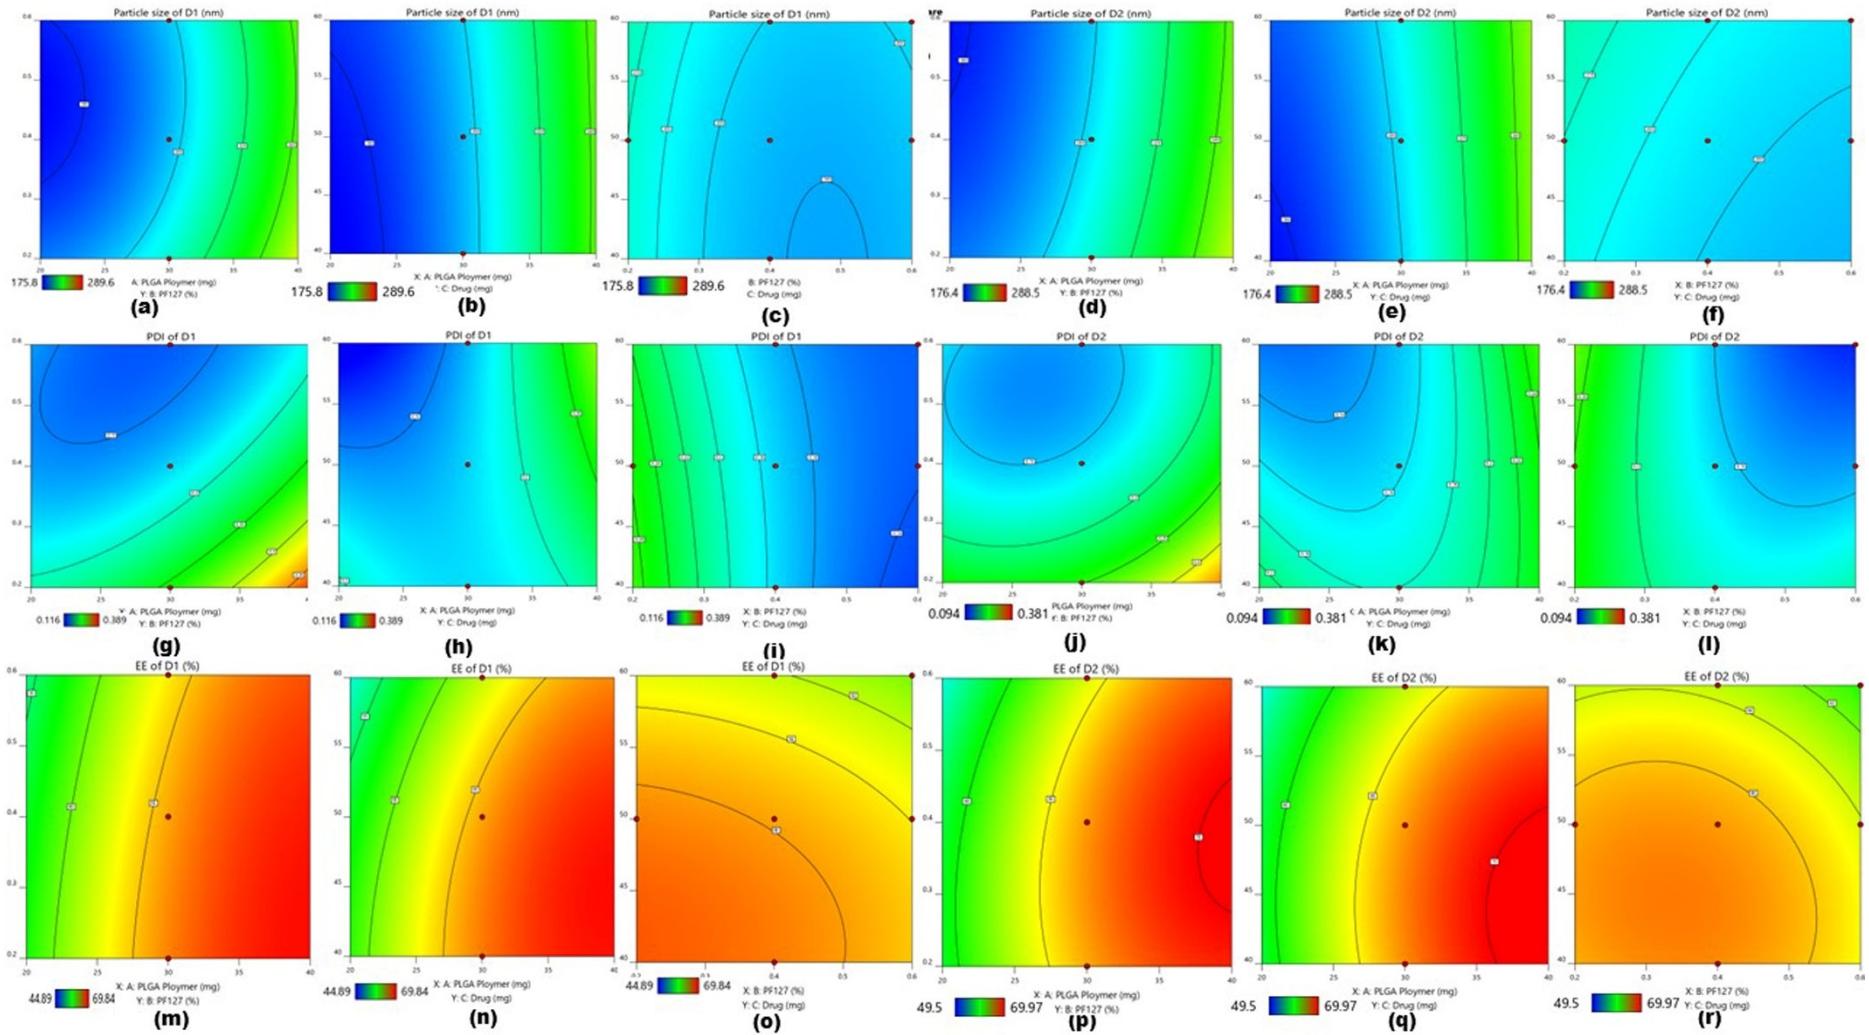

**Figure S3:** Gontour plot of optimization of formulation represented the effect of independent variables on dependent variables. Here, graph a, c, e, g, i, k, m, o and q represented the contour plots of MTF-MPPs while graph b, d, f, h, j, l, n, p, and r represented the contour plots of MI-MPPs formulation

**Table S6:** Summery of fit on all the responses of respective drug having regression analysis between adjusted value vs predicted value

| CQAs                       | Model     | Summary of fit |                |                         |                          |                    |
|----------------------------|-----------|----------------|----------------|-------------------------|--------------------------|--------------------|
|                            |           | P-value        | R <sup>2</sup> | Adjusted R <sup>2</sup> | Predicted R <sup>2</sup> | Adequate precision |
| <b>PS of MTF or D1(Y1)</b> | Quadratic | 0.0001         | 0.9789         | 0.9599                  | 0.9162                   | 25.5939            |
| <b>PS of MI or D2(Y2)</b>  | Quadratic | 0.0020         | 0.9652         | 0.9339                  | 0.8644                   | 20.8877            |
| <b>PDI of D1(Y3)</b>       | Quadratic | <0.0001        | 0.9983         | 0.9968                  | 0.9897                   | 83.4389            |
| <b>PDI of D2(Y4)</b>       | Quadratic | <0.0001        | 0.9952         | 0.9909                  | 0.9831                   | 53.3576            |
| <b>EE of D1(Y5)</b>        | Quadratic | <0.0001        | 0.9836         | 0.9688                  | 0.8966                   | 28.3225            |
| <b>EE of D2(Y6)</b>        | Quadratic | <0.0001        | 0.9927         | 0.9862                  | 0.9642                   | 41.1738            |

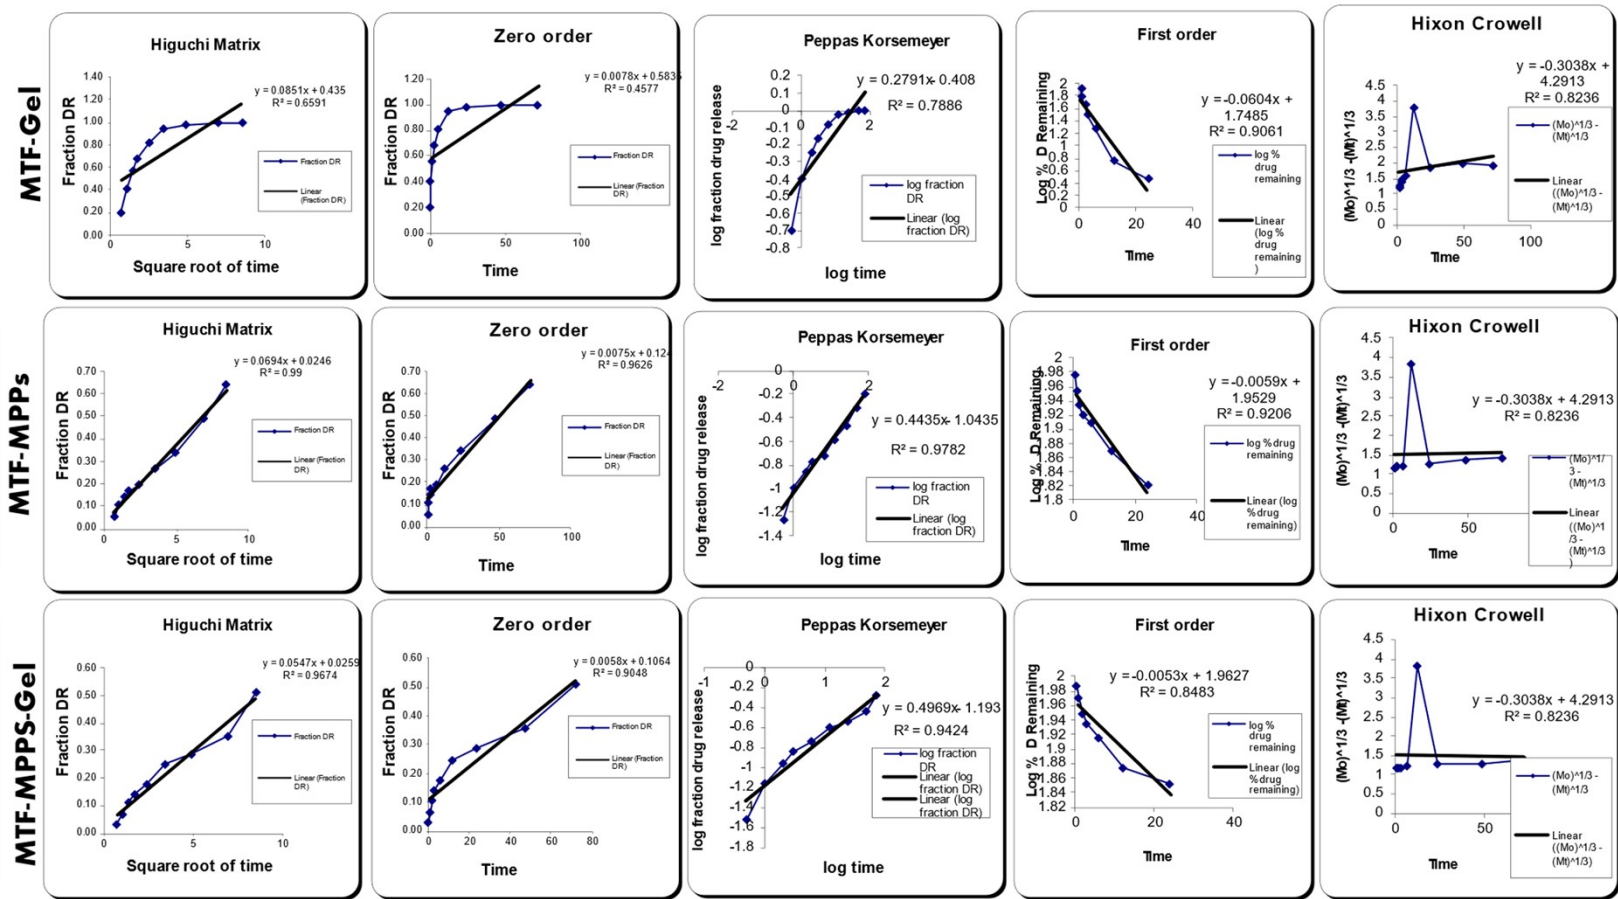

Figure S4: represents the kinetic model of the in-vitro release study: Sample A (MTF-Gel) follow first-order kinetic; sample B(MTF-MPPS) follows zero-order kinetic and sample C (MTF-MPPs-Gel): follows zero-order kinetic

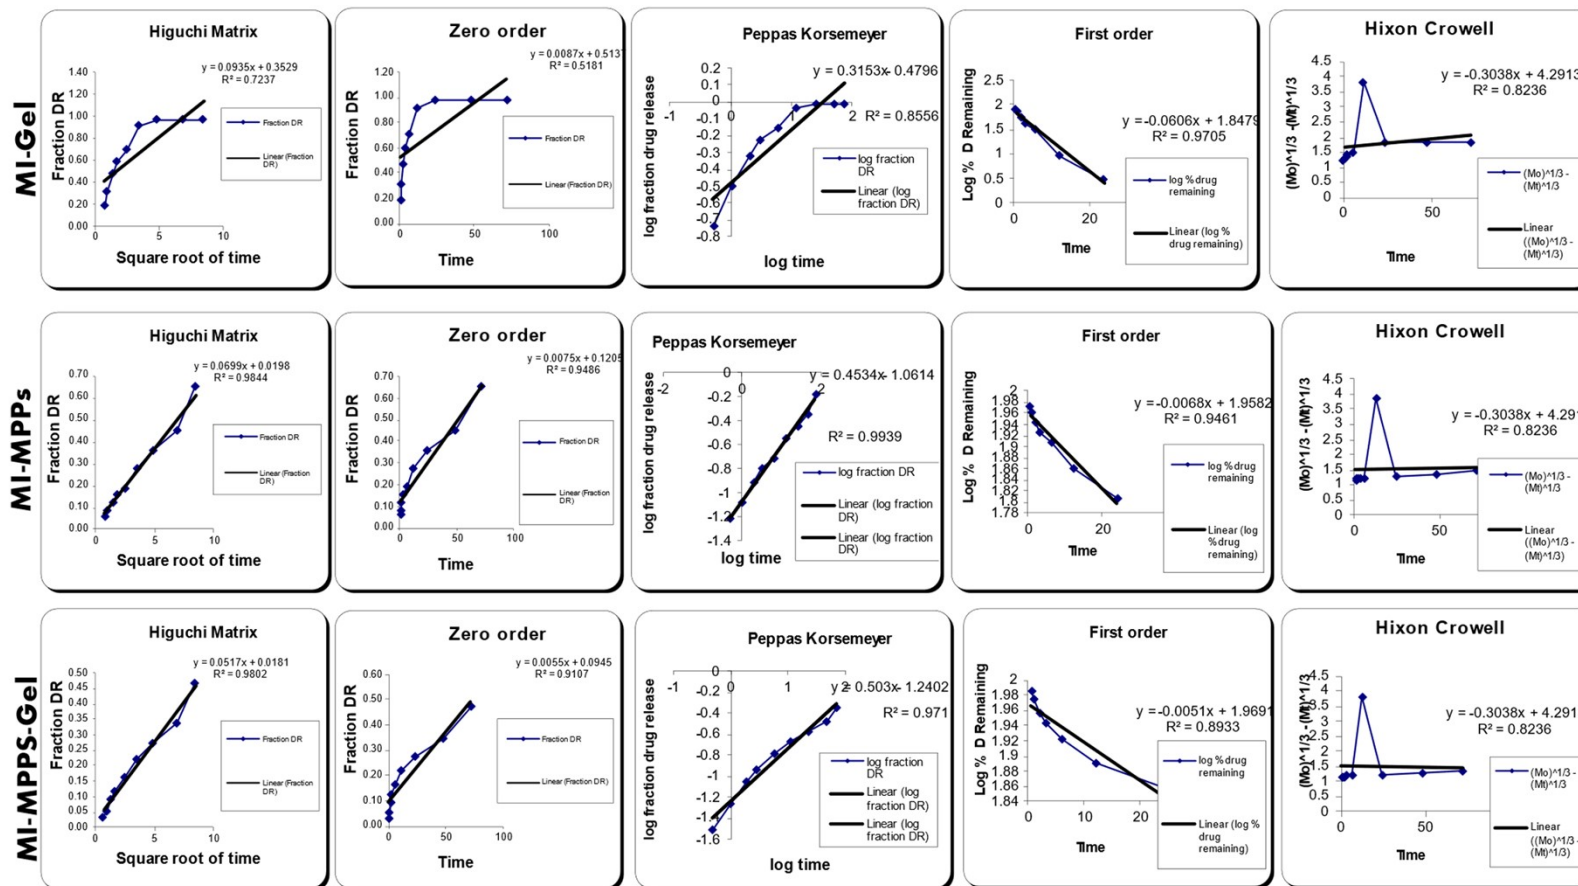

Figure S5: represents the kinetic model of the in-vitro release study: Sample A (MI-Gel) follows first-order kinetic; sample B (MI-MPPs) follows zero-order kinetics and sample C (MI-MPPs-Gel): follows zero-order kinetic
